1     **Multi-locus and long amplicon sequencing approach to**  
2     **study microbial diversity at species level using the**  
3     **MinION<sup>TM</sup> portable nanopore sequencer**

4  
5                                   Alfonso Benítez-Páez<sup>\*</sup>, Yolanda Sanz

6  
7     Microbial Ecology, Nutrition & Health Research Unit. Institute of Agrochemistry and Food  
8     Technology Institute (IATA-CSIC), Valencia, Spain.

9  
10  
11     \*Corresponding author

12     C. Catedràtic Agustín Escardino Benlloch, 7.

13     46980 Paterna-Valencia

14     Spain

15     Tel: +34 963 900 022 ext. 2129.

16     Email: [abenitez@iata.csic.es](mailto:abenitez@iata.csic.es).

17

## 18 **Abstract**

19 **Background:** The miniaturised and portable DNA sequencer MinION™ has demonstrated  
20 great potential in different analyses such as genome-wide sequencing, pathogen outbreak  
21 detection and surveillance, human genome variability, and microbial diversity. In this  
22 study, we tested the ability of the MinION™ platform to perform long amplicon  
23 sequencing in order to design new approaches to study microbial diversity using a multi-  
24 locus approach.

25 **Results:** After compiling a robust database by parsing and extracting the *rrn* bacterial  
26 region from more than 67,000 complete or draft bacterial genomes, we demonstrated that  
27 the data obtained during sequencing of the long amplicon in the MinION™ device using  
28 R9 and R9.4 chemistries was sufficient to study two mock microbial communities in a  
29 multiplex manner and to almost completely reconstruct the microbial diversity contained in  
30 the HM782D and D6305 mock communities.

31 **Conclusions:** Although nanopore-based sequencing produces reads with lower per-base  
32 accuracy compared with other platforms, we presented a novel approach consisting of  
33 multi-locus and long amplicon sequencing using the MinION™ MkIb DNA sequencer and  
34 R9 and R9.4 chemistries that help to overcome the main disadvantage of this portable  
35 sequencing platform. Furthermore, the nanopore sequencing library constructed with the  
36 last releases of pore chemistry (R9.4) and sequencing kit (SQK-LSK108) permitted to  
37 retrieve the higher level of 1D read accuracy sufficient to characterize the microbial species  
38 present in each mock community analysed. Improvements in nanopore chemistry, such as  
39 minimising base-calling errors and new library protocols able to produce rapid 1D libraries,  
40 will provide more reliable information in near future. Such data will be useful for more

41 comprehensive and faster specific detection of microbial species and strains in complex  
42 ecosystems.

43

44 **Keywords:** MinION; Nanopore sequencer; Ribosomal operon; Long amplicon sequencing;

45 Microbial diversity; Long-read sequencing

## 46 **Background**

47 During the last two years, DNA sequencing based on single-molecule technology has  
48 completely changed the perception of genomics for scientists working in a wide range of  
49 scientific fields. This new perspective is not only supported by the technology itself but  
50 also by the affordability of these sequencing instruments. In fact, unprecedentedly, Oxford  
51 Nanopore Technologies (ONT) released the first miniaturised and portable DNA sequencer  
52 in early 2014, within the framework of the MinION<sup>TM</sup> Access Programme. Recently, the  
53 MARC consortium (MinION Analysis and Reference Consortium) has published results  
54 related to the study of the reproducibility and global performance of the MinION<sup>TM</sup>  
55 platform. These results indicate that this platform is susceptible of a large stochastic  
56 variation, essentially derived from the wet-lab and MinION<sup>TM</sup> operative methods, but also  
57 that variability has minimal impact on data quality [1].

58

59 The coordinated and collaborative work and mutual feedback between industry and the  
60 scientific community have enabled ONT to develop rapidly towards improving its portable  
61 platform for DNA sequencing, minimizing the stochastic variation during DNA library  
62 preparation. Consequently, in late Autumn 2015, ONT released MkIb, the latest version of  
63 MinION<sup>TM</sup>, and in April 2016 the fast mode chemistry (R9) was released, increasing the  
64 rate of sensing DNA strands from 30-70 to 280-500 bp/sec and reaching up to 95% of per-  
65 base accuracy in 2D reads (Clive G. Brown, CTO ONT, personal communication).

66

67 One of the most attractive capabilities of the MinION<sup>TM</sup> platform is the sequencing and  
68 assembly of complete bacterial genomes using exclusively nanopore reads [2] or through

69 hybrid approaches [3, 4]. Notwithstanding, the MinION™ platform has also been  
70 demonstrated useful in other relevant areas including: human genetic variant discovery [5,  
71 6], detection of human pathogens [7, 8], detection of antibiotic resistance [9, 10], and  
72 microbial diversity [11, 12]. Regarding the latter, microbial diversity and taxonomic  
73 approaches are common and in high demand to analyse the microbiota associated to a wide  
74 variety of environment- and human-derived samples. However, these analyses are greatly  
75 limited by the short-read strategies commonly employed . Thanks to improvements in the  
76 chemistry of the most common, popular sequencing platforms in recent years, it is now  
77 possible to characterise microbial communities in detail, down to the family or even genus  
78 level, using genetic information derived from roughly 30% (~500nt) of the full 16S rRNA  
79 gene. Despite the massive coverage achieved with short-read methods, the limitation in  
80 terms of read length means taxonomic assignment at the species level is still unfeasible. For  
81 instance, taxonomy strategies based on short-reads from Illumina MiSeq platform offer a  
82 limited information that underestimates the microbial diversity of complex samples when  
83 compared with alternative approaches based on long DNA reads [13]. Consequently,  
84 implementation of long-read sequencing approaches to study larger fragments of marker  
85 genes will permit the design of new studies to provide evidence for the central role of  
86 precise bacterial species/strains in a great variety of microbial consortia. Recent studies at  
87 this regard have showed important advances in taxonomy analysis using long reads  
88 generated by single molecule technologies [11, 14, 15], indicating that the expansion or  
89 inclusion of more hypervariable regions in the analysis overcomes the disadvantage of  
90 working with error-prone DNA reads. With respect to the above, we have recently explored  
91 the performance of the MinION™ device. Our study demonstrates that data obtained from  
92 sequencing nearly full-length 16S rRNA gene amplicons is feasible to study microbial

93 communities through nanopore technology [11]. We wanted to move a step forward in this  
94 type of strategy, thus gaining more specificity when including several hypervariable  
95 markers in the analysis, at sequence and structural level, by designing a multi-locus and  
96 long amplicon sequencing method to study microbial diversity. At the same time, we also  
97 wanted to explore the affordability of the MinION™ technology to perform microbial  
98 diversity analyses by multiplexing several samples in one single MinION™ flowcell.  
99 Accordingly, here we present a study of the 16S, 23S, and the internal transcribed spacer  
100 (ITS, that frequently encodes tRNA genes) simultaneous sequencing, using the MinION™  
101 MkIb device and R9 chemistry, with prior generation of ~4.5kb DNA fragments by  
102 amplifying the nearly full-length operon encoding the two larger ribosomal RNA genes in  
103 bacteria, the *rrn* region (*rrn* hereinafter). We have studied the *rrn* of two mock microbial  
104 communities, composed of genomic DNA from 20 and 8 different bacterial species,  
105 obtained respectively from BEI Resources and ZYMO Research Corp., using the  
106 MinION™ sequencing platform in multiplex configuration.

107

## 108 **Data description**

109 The R9 raw data collected in this experiment was obtained as fast5 files using  
110 MinKNOW™ v0.51.3.40 (Oxford Nanopore Technologies) after conversion of electric  
111 signals into base calls via the Metrichor™ agent v2.40.17 and the Barcoding plus 2D  
112 Basecalling RNN for SQK-NSK007 workflow v1.107; whereas the R9.4 raw data was  
113 generated by MinKNOW™ v1.5.5 (Oxford Nanopore Technologies) with the respective  
114 local basecalling algorithm implemented in that version of the MinION™ controller  
115 software. Base-called data passing quality control and filtering were downloaded and data

116 was converted to fasta format using the *poRe* package [16]. Fast5 raw data can be accessed  
117 at the European Nucleotide Archive (ENA) under the project ID PRJEB15264. Only two  
118 data sets were generated after a sequencing run of MinION™ MkIb.

119

## 120 **Analysis**

121 *Defining the arrangement of the rrn region.* The complete or partial gene sequence of the  
122 RNA attached to the small subunit of the ribosome is classically used to perform taxonomy  
123 and diversity analysis in complex samples containing hundreds of microbial species. In the  
124 case of bacterial species, the 16S rRNA gene is the most widely used DNA marker for  
125 taxonomic identification of a particular species, given the relatively high number of  
126 hypervariable regions (V1 to V9) present across its sequence. Nowadays, it is possible to  
127 study the complete or almost full-length sequence of the 16S rRNA molecule thanks to  
128 single-molecule sequencing approaches [11, 14, 15, 17]. The identification of complex  
129 microbial communities at species-level with raw data obtained from MinION™ or PacBIO  
130 platforms is improving; however, uncertainty in taxonomic assignment is still noteworthy  
131 given the high proportion of errors in their reads. While future technical advances may  
132 improve the quality of DNA reads generated by third generation sequencing devices, new  
133 strategies can also be adopted to enhance the performance of these approaches.  
134 Consequently, we postulate that a good example of this is to study a common multi-locus  
135 region of the bacterial genome, which enables the simultaneous study of more variable  
136 regions and locus arrangements (sequence and structural variation), such as the operon  
137 encoding the ribosomal RNA. Using a complex sample where hundreds of microbial  
138 species are potentially present (DNA from human faeces) we carried out preliminary

139 experiments to amplify the *rrn*. We observed that from the hypothetical configurations  
140 envisaged for the *rrn* (Figure 1A), we only obtained a clear amplification using the primer  
141 pairs S-D-Bact-0008-c-S-20 and 23S-2241R, indicating that the *rrn* preferentially seems to  
142 be transcriptionally arranged as follows: 16S-ITS-23S. A detailed evaluation of the  
143 fragment size determined that main PCR products ranged from 4.3 to 5.4kbp (Figure 1B-  
144 D), being consistent with the expected size of PCR products amplifying the 16S, ITS, and  
145 23S regions from several microbial species. The next step involved designing a multiplex  
146 sequencing approach to try to analyse more than one sample per sequencing run in one  
147 flowcell of MinION™; therefore, the primers were re-designed to include a distinctive  
148 barcode region at 5' (Table 1). During PCR of the *rrn* we tagged the amplicon derived from  
149 the mock community HM782D with the barcode *bc01* in a dual manner, whereas the  
150 amplicons derived from sample D6305 were tagged with barcode *bc08* in similar way.  
151 Parallel experiments were conducted on HM782D and D6305 DNA, with comparative  
152 aims, using a conventional protocol of microbial diversity analysis and consisting of the  
153 V4-V5 16S amplicon sequencing by Illumina MiSeq paired-end approach (see methods).  
154  
155 *The reference database.* One of the major handicaps when proposing this new *rrn* region to  
156 be used for taxonomy analysis is the need to compile a reference database to compare the  
157 reads produced by MinION™ device. Therefore, we proceeded to parse the genetic  
158 information of over 67,000 bacterial genomes whose sequences are publicly available in  
159 GenBank at NCBI. In this way, we retrieve and compile more than 47,000 *rrn* sequences  
160 that were subject of a clustering analysis to reduce the level of redundancy and to disclose  
161 the variability intrinsically associated to the *rrn* itself and to its individual components as  
162 well (Figure 2).



163 After normalization of cluster numbers against the median size of respective regions  
164 analyzed and referenced against the numbers obtained for 16S region at 97% sequence  
165 identity, we found that *rrn* region comprising the 16S, ITS, and 23S coding regions exhibits  
166 more than 4-fold more variation than that observed for the 16S molecule alone (at 100%  
167 sequence identity). As expected, the 23S region exhibited more diversity by containing  
168 more hypervariable regions than 16S region and getting almost 2-fold more diversity.  
169 Strikingly, the ITS regions showed similar levels of genetic diversity despite to have almost  
170 one fourth of the size of 16S region in average. When parsing the genetic information of  
171 over 67,000 bacterial genomes, we observed the ITS region frequently encodes one or  
172 several tRNA genes and it possess a high variability in terms of length as well.  
173 Consequently, the variability observed in the *rrn* was the largest observed and thought to be  
174 meaningful for the aims of this study. We obtaining data supporting the above notion by  
175 searching the number of *rrn* clusters (at 100% identity) matching with the most  
176 predominant species in the database, thus retrieving 1,713, 1,276, and 1,273 *rrn* clusters  
177 annotated for *Escherichia coli*, *Streptococcus pneumoniae*, and *Staphylococcus aureus*,  
178 respectively. In consequence, the *rrn* is able to accumulate enough sequence variability to  
179 discern taxonomy even at strain level.

180

181 *Performance of the R9 chemistry.* Once we could compile a reference database for  
182 comparison aims, we proceeded with the amplicon library construction and sequencing run  
183 obtaining raw data consisting of 17,038 reads and almost all were classified as 1D reads.  
184 For general knowledge, the DNA reads derived from the MinION<sup>TM</sup> device can be  
185 classified into three types: ‘1D template’, ‘1D complement’, and ‘2D’ reads. The latter, 2D  
186 reads, are products of aligning and merging sequences from the template (read from leader

187 adapter) and complement reads (a second adapter called hairpin or HP adapter must be  
188 generated), produced from the same DNA fragment. These contain a lower error rate,  
189 owing to strand comparison and mismatch correction. In addition to the technical issues  
190 indicative of a bad ligation of the HP adapter, we obtained 93% of reads (~15,900 reads)  
191 during the first 16h of run; thus, we obtained lower sequencing performance after re-  
192 loading with the second aliquot of the sequencing library and extended the run for another  
193 24h (40h in sum). The fasta sequences were filtered by retaining those between 1,500 and  
194 7,000 nt in length, obtaining at least enough sequence information to compare a DNA  
195 sequence equivalent to the 16S rRNA gene length. After this filtering step, we retained 72%  
196 of sequences (12,278) and then we performed the respective barcode splitting. For this  
197 purpose, we modified the default parameters of the "split\_barcodes.pl" perl script (Oxford  
198 Nanopore Technologies) by incorporating the information of the extended barcodes ([Table](#)  
199 [1](#)), rather than the barcode information alone, and simultaneously increased the stringency  
200 parameter to 25 (14 by default). Afterwards the concatenation of reads were obtained from  
201 respective forward and reverse extended barcodes, then we retrieved a total of 2,019 (52%  
202 from forward and 48% from reverse barcodes) and 1,519 (53% from forward and 47% from  
203 reverse barcodes) 1D reads for HM782D and D6305 mock communities, respectively.  
204 Read-mapping was performed against the *rrn* database, compiling more than 22,000 *rrn*  
205 regions, retrieved from more than 67,000 genomes available in GenBank (see [Availability](#)  
206 [of supporting data](#)). The taxonomy associated to the best hit based on the competitive  
207 alignment score followed by filtering steps (see methods) was used to determine the  
208 structure of each mock community. The MinION<sup>TM</sup> sequencing data produced the microbial  
209 structure presented in [Figure 3](#) for the mock communities HM782D and D6305,  
210 respectively.

211

212 **Figure 3** shows the bacterial species and their respective relative proportions retrieved from  
213 the analysis of the mock communities HM782D and D6305, respectively. With respect to  
214 the HM782D mock community, we were able to recover 20 representative species,  
215 accounting for 16 out of 20 species present in that artificial community (**Figure 3A**).  
216 However, the remaining four species that apparently are absent in this community have a  
217 close relationship to others detected correctly, namely *Bacillus subtilis*, *Bacillus*  
218 *thuringensis*, *Bacillus anthracis*, and *Propionibacterium sp.* Furthermore, we were unable  
219 to report the presence of just four species present in HM782D because proportions of  
220 *Rhodobacter sphaeroides* and *Actinomyces odontolyticus* were below the predominance  
221 threshold (1%), being present in 0.25 and 0.12%, respectively. Similarly, other 40 different  
222 species but close to that present in the HM782D mock community (*Bacillus spp.*,  
223 *Streptococcus spp.* *Clostridium spp.*, *Neisseria spp.*, *Staphylococcus spp.*, and *Listeria*  
224 *spp.*) had minor representation in data derived from *rrn* sequencing. With respect to  
225 *Rhodobacter sphaeroides* and *Actinomyces odontolyticus* lower proportions, we have  
226 previously demonstrated that the low levels of 16S reads are a consequence of  
227 amplification bias derived from the PCR reaction and not from sequencing itself [11]. In  
228 this case, the new primer pair used to generate the long amplicons would seem to work  
229 more efficiently than those previously used, but apparently they still present issues at  
230 bacterial coverage level. When we revised the whole taxonomy contained in our *rrn*  
231 database, the compiling of non *rrn* regions for *Deinococcus radiodurans* and *Helicobacter*  
232 *pylori* partially explained the lack of these species in HM782D analysed by the present  
233 approach. However, a new alignment process using individual 16S and 23S rRNA  
234 sequences obtained from GenBank and including those for *D. radiodurans* and *H. pylori*,

235 respectively, demonstrated that at least *D. radiodurans* could be identified in a higher  
236 proportion than *A. odontolyticus* and *R. sphaeroides*, albeit in a lower proportion than our  
237 predominance threshold. Regarding the results obtained from the D6305 mock community,  
238 we found a total of 10 bacterial species present in this mixed DNA sample, eight of them  
239 matched the expected structure of the community, and additionally 18 close species had  
240 minor representation (*Bacillus* spp., *Enterococcus* spp., *Klebsiella* spp., *Lactobacillus* spp.,  
241 *Streptococcus* spp., and *Staphylococcus* spp.). Using the MinION™ data we were able to  
242 recover 100% of the species present in this sample and the two additional members  
243 identified also have a close relationship within the *Bacillus* genus, as observed in the  
244 HM782D sample (Figure 3B). We have determined that coverage needed to retrieve all  
245 expected species in a non-even mock community with an abundance above 1% is ~13X in  
246 terms of the number of species of that community.

247

248 When compared to reference values and proportions theoretically expected for the species  
249 present in the two mock communities, we observed some deviations that were greater in  
250 certain species. Particularly, in the HM782D sample the lowest coverage biases were  
251 observed for *Actinomyces odontolyticus* (-5.36), *Rhodobacter sphaeroides* (-4.36), and  
252 *Enterococcus faecalis* (-2.04). This indicates that such species, in addition to *D.*  
253 *radiodurans* and *H. pylori*, are more difficult to detect with the primers and PCR used here.  
254 By contrast, *Escherichia coli* (1.79) seems to be preferentially amplified, given that this  
255 species exhibited the highest positive coverage bias value (Figure 3C). We again found that  
256 coverage bias is linearly correlated with PCR products generated by quantifying *E.coli*, *L.*  
257 *gasseri*, and *B. vulgatus* amplicons (Pearson's  $r = 0.82$ ,  $p = 0.047$ ), data indicating that there  
258 are not major issues during taxonomy assignment by over-representation of certain species

259 in the reference database. The values obtained for D6305 were more homogeneous, and the  
260 lowest coverage bias was observed for *Lactobacillus fermentum* (-2.18) (Figure 3D).  
261 Additional analysis indicated that there was not significant correlation between coverage  
262 bias and GC content in *rrn*. Although the low coverage bias for some species can be solved  
263 by selecting another pair of primers, the ability to recover almost all of them, at least in a  
264 low proportion, in itself represents an important attribute of this approach for inter-sample  
265 comparisons. Interestingly, we observed a similar pattern of overrepresentation of *Bacillus*  
266 spp. sequences (>50%) in D6305 sample but not for *Escherichia* spp. sequences (~4%) in  
267 the HM782D mock community when Illumina MiSeq data was assessed (Figure 3C-D).  
268  
269 The high error rate of the 1D reads (ranging between 70 and 87% sequence identity,  
270 according to high quality alignments) makes barcoding de-multiplexing a difficult task in  
271 nanopore data. However, our results indicate that with the configuration and parameters  
272 presented here we could efficiently distinguish the reads generated from HM782D and  
273 D6305 amplicons. As a consequence, the performance of this long amplicon approach to  
274 properly assign microbial communities to samples was efficiently assisted by the  
275 parameters during the de-multiplexing process that were central to discern reads obtained  
276 from respective samples multiplexed in the MinION flowcell. For instance, the distribution  
277 of reads matching with close related species such as *Lactobacillus gasseri* and  
278 *Lactobacillus fermentum*, contained distinctively in HM782D and D6305 samples, was  
279 indicative of the adequate execution of the de-multiplexing pipeline. The above was also  
280 exemplified for *Salmonella enterica* sequences that were determined only in D6305 despite  
281 its close relationship with *E. coli* at the 16S and 23S sequence level (close to 100%).  
282 Regarding the latter, the multiple sequence alignment built with *rrn* regions from both

283 species was inspected directly distinguishing the ITS as the major source of variation  
284 between the two species. Indeed, this was corroborated by the comparative analysis  
285 performed during the clustering step of the reference samples to create our *rrn* database.

286

287 *Performance of R9.4 chemistry.* During the course of the present work the MinION R9.4  
288 chemistry was delivered in Autumn 2016. Therefore, we wanted to perform a replicate  
289 experiment using this type of chemistry in order to disclose how much improvement our  
290 approach would gain in terms of sensibility and specificity. With only 3h run we observed a  
291 notable improvement of throughput and per-base accuracy and the MinION™ produced  
292 almost 40,000 reads with a predominant QScore distribution between 8 and 12 suggesting a  
293 theoretical error rate of reads between 0.15 to 0.06, respectively, lower than obtained from  
294 R9 reads (0.25 to 0.15). After compiling all sequences in a fasta file, we proceeded to  
295 perform filtering in equal manner than previously done for R9 data. Consequently, we  
296 retained more than 33,000 reads (86%) for further processing and taxonomy assignment.  
297 The major results from comparison among R9 and R9.4 runs are summarized in the [Table](#)  
298 [2](#). As expected, the R9.4 dataset was more accurate and its reads showed a lower per-base  
299 error rate, therefore, the taxonomy analysis based on this reads would be more precise than  
300 observed with R9 reads. Globally, the results obtained from R9.4 chemistry are very similar  
301 than those observed with R9 chemistry but the level of uncertainty was diminished by  
302 reducing the number of close species to that contained in respective mock communities  
303 exhibiting very low abundance (<1%), thus decreasing from 40 species to 15 for the  
304 HM782D and from 18 to 16 for the D6305. We were unable again to recover *D.*  
305 *radiodurans* and *H. pylori* reads but we improved the sensitivity for *A. odontolyticus* and *R.*  
306 *sphaeroides* ([Figure 3C and 3D](#)), whose relative proportions were almost duplicated in

307 R9.4 data (*R. sphaeroides* = 0.44%, *A. odontolyticus* = 0.31%). We compared the  
308 respective proportions obtained from R9 and R9.4 chemistries obtaining consistent results  
309 (Figure 3E) indicating that our approach is reproducible with no major changes despite the  
310 different chemistry and kits for library preparation using during both sequencing runs.

311

312 *Comparison with Illumina MiSeq data.* The Illumina MiSeq data obtained after sequencing  
313 the V4-V5 16S region permitted to characterize the genus distribution in the HM782D  
314 sample with the RDP Classifier. As a result, we compiled distribution of all 17 genus  
315 represented in the HM782D mock community (Supplementary Material 1) and 4 additional  
316 genus with very low abundance (2 reads / 8,409 assigned). Moreover, when a OTU-picking  
317 approach was conducted we recovered 41 OTUs whose identity was evaluated in the SINA  
318 server (Supplementary Material 2). Globally, we recovered taxonomy identification of all  
319 genus expected but only three species were well identified based on the Greengenes  
320 taxonomy (*H. pylori*, *P. acnes*, and *R. sphaeroides*) whereas one was wrongly identified  
321 (*Neisseria cinerea*). For the D6305 mock community we could recover the eight different  
322 component at genus level of this mock community (Supplementary Material 1) plus seven  
323 additional and not related genus with very low abundance (< 7 reads / 8,046 assigned). At  
324 OTUs level, we retrieved a total of 14 sequences whose taxonomy identification is  
325 presented in the Supplementary Material 3. In this case, only *S. enterica* could be identified  
326 at species level. Given that data derived from this short read approach normally cannot  
327 reach a reliable taxonomy assignment down to species level, we proceed to make  
328 comparisons with R9 and R9.4 data by compiling these last information to genus level in  
329 order to evaluate the performance of our approach with a commonly used procedure. In the  
330 Supplementary Material 1 and Table 3 a comparison in terms of the relative read proportion

331 and coverage bias is depicted. We observed no larger deviations in data retrieved with  
332 MinION regarding those numbers obtained with conventional approaches such as study of  
333 V4-V5 regions with MiSeq platform. Interestingly, we observed similar pattern of  
334 important negative coverage bias in all three approaches for *Actinomyces* spp.,  
335 *Enterococcus* spp., and *Rhodobacter* spp. species in the HM782D community and for  
336 *Lactobacillus* spp., and *Listeria* spp., in the D6305 community, then suggesting that species  
337 of such genera are equally underrepresented no matter the type of amplicon, sequencing  
338 platform, or sequencing chemistry of study. Conversely, only the *Bacillus* spp. species from  
339 the D6305 exhibited large positive coverage bias values in all three approaches. Globally,  
340 all methods compared to study microbial communities at this level have a pattern of  
341 underrepresentation for all species present in the mock communities given the average and  
342 median values obtained. Moreover, the MiSeq V4-V5 approach also showed important  
343 coverage bias indicating this issue is not strictly associated with the MinION™ based  
344 approach presented in here and probably it is inherent to the amplification process of target  
345 DNA. Finally, correlation tests indicate that despite of coverage bias observed all  
346 configurations used to study the mock communities replicate fairly well the composition of  
347 the mock communities and that data obtained from R9 and R9.4 experiments show a slight  
348 improvement at this regard with no major differences when compared with data from  
349 MiSeq platform ([Table 3](#)).

350

## 351 **Discussion**

352 The inventory of microbial species based on 16S rDNA sequencing is frequently used in  
353 biomedical research to determine microbial organisms inhabiting the human body and their



354 relationship with disease. Recently, third-generation of DNA sequencing platforms have  
355 developed rapidly, facilitating the identification of microbial species and overcoming the  
356 read-length issues inherent to second-generation sequencing methods. These advances  
357 allow researchers to infer taxonomy and analyse diversity from the almost full-length  
358 bacterial 16S rRNA sequence [11, 14, 15, 17]. Particularly, the ONT platform deserves  
359 special attention given its portability and its fast development since the MinION™ became  
360 available in 2014. Notwithstanding, this technology is susceptible to a large stochastic  
361 variation, essentially derived from the wet-lab methods [1]. We corroborated this issue by  
362 obtaining a sequencing run where the raw data predominantly consisted of 1D reads as a  
363 consequence of the HP adapter ligation failure, despite following the manufacturer's  
364 instructions. However, we were able to develop an efficient analysis protocol where the  
365 higher read quality offered by R9 chemistry and the updated Metrichor basecaller protocol  
366 proved pivotal to obtain 1D reads with a range of identity between 70 and 86%, with  
367 sufficient per-base accuracy to successfully perform the taxonomic analyses described  
368 herein. Moreover, during the course of this study the R9.4 flowcells were released and we  
369 were able to replicate our approach using this improved pore chemistry and the SQK-  
370 LSK108 for 1D libraries obtaining reads with sequence identity up to 92%.

371

372 Our preliminary results indicated that the *rrn* region in bacteria preferentially has a unique  
373 conformation (with the transcriptional arrangement of 16S-ITS-23S) and we could amplify  
374 this ~4.5Kbp region with the selected S-D-Bact-0008-c-S-20 and 23S-2241R primer pair.  
375 Once we were able to distinguish the feasibility to amplify the *rrn*, our approach comprised  
376 the study of two different mock communities in a multiplex manner, to be combined in one  
377 single MinION™ flowcell. By designing the respective forward and reverse primers tagged

378 with specific barcodes recommended by ONT, we were able to retrieve extended barcode-  
379 associated reads, in spite of the large proportion of per-base errors contained in these types  
380 of reads. Using MinION<sup>TM</sup> data based on multi-locus markers and long amplicon  
381 sequencing, we could reconstruct the structure of two commercially available mock  
382 communities. Although the expected proportions of some species in each community  
383 exhibited an important coverage bias, we were able to recover 80% (HM782D) and 100%  
384 (D6305) of bacterial species from the respective mock communities. Consequently, future  
385 analyses should be conducted to find an appropriate PCR approach using primers with a  
386 higher coverage for bacterial species.

387

388 We have analysed a great amount of genetic information with the aim of compiling a  
389 valuable database containing the genetic information for the *rrn* present in over 67,000  
390 draft and complete bacterial genomes. The global length distributions in the region  
391 indicated that the *rrn* was  $4,993 \pm 187$  bp in length whereas the 16S, ITS, and 23S sub-  
392 regions were  $1,612 \pm 75$ ,  $488 \pm 186$ , and  $3,036 \pm 160$  bp in length, respectively. Using this  
393 genetic information of the *rrn* and clustered at 100% of sequence identity enabled us to  
394 establish a multi-locus marker able to discriminate the taxonomy of two mock communities  
395 containing very close species. The latter was possible given that simultaneous analysis of  
396 the 16S, ITS, and 23S molecules offered almost 40-fold more diversity than studying the  
397 16S, ITS, or 23S sequences separately and at 97% sequence identity. Moreover, the ITS  
398 was distinguished individually as an important variable genetic region in terms of sequence  
399 and length. Furthermore, it contributes notably to the higher variability observed in the *rrn*  
400 region, a fact evidenced in previous studies [18-21]. The accumulation of a larger number  
401 of variable sites in the *rrn* region, together with the particular structural variation of the ITS

402 to potentially accommodate and encode tRNA genes, are thought to be central to  
403 discriminating bacterial species, despite the large proportion of per-base errors contained in  
404 MinION™ reads. Our data indicate that our MinION reads produce alignments with  
405 averaged length of 2,463 and 3,191 bases for HM782D and D6305, respectively, using R9  
406 chemistry and 4,173 and 4,115 bases for HM782D and D6305, respectively, using R9.4  
407 chemistry. Consequently, the taxonomy assignment was predominantly based on the  
408 variability of more than two out of the three markers included in the *rrn*, no matter if reads  
409 were produced from the 16S or 23S edges of *rrn* amplicons. We expect this type of analysis  
410 will likely become more accurate over time as nanopore chemistry improves in near future,  
411 with the concomitant increase in throughput, which is pivotal to disclose the hundreds of  
412 species present in complex microbial communities for analysis in human or environmental  
413 studies. Therefore, the multi-locus, long and multiplex methods described here represent a  
414 promising analysis routine for microbial and pathogen identification, relying on the  
415 sequence variation accumulated in approximately 5kbp of DNA, roughly accounting for the  
416 assessment of 1.25% of an average bacterial genome (~4Mbp). Notwithstanding, we cannot  
417 obviate that the current state of this approach presents some limitations in terms of the  
418 completeness of the *rrn* database created as well as the efficiency of the primers used to  
419 generate the long amplicons that have to be revisited in order to improve and increase the  
420 coverage of bacterial species. At date, our database include *rrn* sequences from 2,479  
421 different species grouped into 918 different genus. In consequence, urgent studies must be  
422 undertaken to generate a more complete database including the *rrn* genomic information  
423 from species inhabiting complex and real samples such as those derived from human body.  
424

## 425 **Methods**

### 426 *Bacterial DNA and rrn amplicons*

427 The complex DNA sample for preliminary studies of *rrn* region arrangement consisted of  
428 DNA isolated from faeces, kindly donated by a healthy volunteer upon informed consent.  
429 An aliquot of 200 mg of human faeces was used to isolate microbial DNA using the  
430 QIAamp DNA Stool Mini Kit (Qiagen) and following the manufacturer's instructions.  
431 Finally, DNA was eluted in 100  $\mu$ L nuclease-free water and a DNA aliquot at 20 ng/ $\mu$ L  
432 was prepared for PCR reaction using the primer pairs S-D-Bact-0008-c-S-20 and 23S-  
433 2241R or 23S-129F and S-D-Bact-1391-a-A-17 for testing configurations shown in [Figure](#)  
434 [1A](#) ([Table 1](#)). The band size was analysed using the Java-based GelAnalyzer tool  
435 ([www.gelanalyzer.com](http://www.gelanalyzer.com)). Genomic DNA for the reference mock microbial communities  
436 was kindly donated by BEI Resources (<http://www.beiresources.org>) and ZYMO Research  
437 Corp (<http://www.zymoresearch.com>). The composition of the mock communities was as  
438 follows: i) HM782D is a genomic DNA mixture of 20 bacterial species containing  
439 equimolar ribosomal RNA operon counts (100,000 copies per organism per  $\mu$ L), as  
440 indicated by the manufacturer; and ii) ZymoBIOMICS Cat No. D6305 (D6305 hereinafter)  
441 is a genomic DNA mixture of eight bacterial species (and two fungal species) presented in  
442 equimolar amounts of DNA. According to manufacturers' instructions, 1  $\mu$ L of DNA from  
443 each mock community was used to amplify all the genes contained in the *rrn*. DNA was  
444 amplified in triplicate by 27 PCR cycles at 95°C for 30 s, 49°C for 15 s, and 72°C for 210 s.  
445 Phusion High-Fidelity Taq Polymerase (Thermo Scientific) and the primers S-D-Bact-  
446 0008-c-S-20 (mapping on 5' of 16S gene) and 23S-2241R (mapping on 3' of 23S gene),  
447 which target a wide range of bacterial 16S rRNA genes [22, 23]. For the Illumina MiSeq

448 sequencing the V4-V5 hypervariable regions from bacterial 16S rRNA gene were amplified  
449 using 1  $\mu$ L of DNA from each mock community and 25 PCR cycles at 95°C for 20 s, 40°C  
450 for 30 s, and 72°C for 20 s. Phusion High-Fidelity Taq Polymerase (Thermo Scientific) and  
451 the 6-mer barcoded primers S-D-Bact-0563-a-S-15 (AYTGGGYDTAAAGNG) and S-D-  
452 Bact-0907-a-A-20 (CCGTCAATTYMTTTRAGTTT). As we wished to multiplex the  
453 sequencing of both mock communities into one single MinION™ flowcell, we designed a  
454 dual-barcode approach where respective primers were synthesized and fused with two  
455 different barcodes recommended by ONT (Table 1). Amplicons consisted of ~4.5kbp blunt-  
456 end fragments for MinION approach and ~380bp for Illumina MiSeq approach, and those  
457 were purified using the Illustra GFX PCR DNA and Gel Band Purification Kit (GE  
458 Healthcare). Amplicon DNA was quantified using a Qubit 3.0 fluorometer (Life  
459 Technologies). Quantification of certain PCR products to correlate with sequencing  
460 coverage bias by qPCR was assessed according to previously described [11].

461

#### 462 *Amplicon DNA library preparation*

463 The Genomic DNA Sequencing Kit SQK-MAP006 was ordered from ONT and used to  
464 prepare the amplicon library for loading into the MinION™. Approximately 0.9  $\mu$ g of  
465 amplicon DNA (0.3 per mock community plus 0.3  $\mu$ g of an extra query sample consisting  
466 amplicons obtained from a genomic DNA mix of several uncharacterized microbial  
467 isolates) were processed for end repair using the NEBNextUltra II End Repair/dA-tailing  
468 Module (New England Biolabs), and followed by purification using Agencourt AMPure  
469 XP beads (Beckman Coulter) and washing twice with 1 volume of fresh 70% ethanol.  
470 Subsequently, and according to the manufacturer's suggestions, we used 0.2 pmol of the

471 purified amplicon DNA (~594 ng, assuming fragments of 4.5kbp in length) to perform the  
472 adapter ligation step. Ten  $\mu\text{L}$  of adapter mix, 2  $\mu\text{L}$  of HP adapter, and 50  $\mu\text{L}$  of Blunt/TA  
473 ligase master mix (New England Biolabs) were added in that order to the 38  $\mu\text{L}$  end-  
474 repaired amplicon DNA. The reaction was incubated at room temperature for 15 minutes, 1  
475  $\mu\text{L}$  HP Tether was added and incubated for an additional 10 minutes at room temperature.  
476 The adapter-ligated amplicon was recovered using MyOne C1-beads (Life Technologies)  
477 and rinsed with washing buffer provided with the Genomic DNA Sequencing Kit SQK-  
478 MAP006 (Oxford Nanopore Technologies). Finally, the sample was eluted from the  
479 MyOne C1-beads by adding 25  $\mu\text{L}$  of elution buffer and incubating for 10 minutes at 37°C  
480 before pelleting in a magnetic rack. The R9.4 sequencing library was obtained by  
481 processing of 600 ng of purified amplicon DNA (0.15 per mock community plus 0.15  $\mu\text{g}$  of  
482 two extra query sample consisting amplicons obtained from a genomic DNA mix of several  
483 uncharacterized microbial isolates) with the SQK-LSK108 (Oxford Nanopore  
484 Technologies) sequencing for 1D reads and following the manufacturer's instructions.  
485 Briefly, the 600 ng of amplicon DNA diluted in 50  $\mu\text{L}$  nuclease-free water were processed  
486 for end repair using the NEBNextUltra II End Repair/dA-tailing Module (New England  
487 Biolabs), and followed by purification using Agencourt AMPure XP beads (Beckman  
488 Coulter) and washing twice with 200  $\mu\text{L}$  volume of fresh 70% ethanol. The ligation step  
489 was performed with 30  $\mu\text{L}$  of DNA end-prepped, 20  $\mu\text{L}$  adapter mix, and 50  $\mu\text{L}$  of Blunt/TA  
490 ligase master mix (New England Biolabs). The reaction was incubated at room temperature  
491 for 15 minutes at room temperature. The adapter-ligated amplicon was recovered again  
492 Agencourt AMPure XP beads (Beckman Coulter), washing twice with the ABB buffer  
493 supplied into the SQK-LSK1008 sequencing kit (Oxford Nanopore Technologies), and

494 eluted from Agencourt AMPure XP beads by adding 25  $\mu$ L of elution buffer and incubating  
495 for 10 minutes at 37°C before pelleting in a magnetic rack. Samples for Illumina MiSeq  
496 approach were sent to the National Center for Genomic Analysis (CNAG, Spain) for  
497 multiplex sequencing in one lane of MiSeq instrument with 2x300 paired-end  
498 configuration.

499

#### 500 *Flowcell set-up*

501 A brand new, sealed R9 flowcell was acquired from ONT and stored at 4°C before use. The  
502 flowcell was fitted to the MinION™ MkIb prior to loading the sequencing mix, ensuring  
503 good thermal contact. The R9 flowcell was primed twice using 71  $\mu$ L premixed nuclease-  
504 free water, 75  $\mu$ L 2x running buffer, and 4  $\mu$ L fuel mix. At least 10 minutes were required  
505 to equilibrate the flowcell before each round of priming and before final DNA library  
506 loading. For the replicate experiment, a R9.4 flowcell was fitted to the MinION™ MkIb  
507 prior to loading the sequencing mix, ensuring good thermal contact. The R9.4 flowcell was  
508 primed with 800  $\mu$ L of running buffer (0.5 mL nuclease-free water plus 0.5 mL RBF  
509 buffer). At least 10 minutes were required to equilibrate the flowcell and then the remaining  
510 200  $\mu$ L of running buffer were injected into the R9.4 flowcell with the SpotON port  
511 opened.

512

#### 513 *Amplicon DNA sequencing*

514 The sequencing mix was prepared with 59  $\mu$ L nuclease-free water, 75  $\mu$ L 2x running buffer,  
515 12  $\mu$ L DNA library, and 4  $\mu$ L fuel mix. A standard 48-hour sequencing protocol was  
516 initiated using the MinKNOW™ v0.51.3.40. Base-calling was performed through data

517 transference using the Metrichor™ agent v2.40.17 and the Barcoding plus 2D Basecalling  
518 RNN for SQK-NSK007 workflow v1.107. During the sequencing run, one additional  
519 freshly diluted aliquot of DNA library was loaded after 16 hours of initial input. The raw  
520 sequencing data derived from the two mock communities studied here was expected to  
521 account two-thirds of the data produced by the R9 flowcell used. The R9.4 run was  
522 performed with 75 µL DNA library (37.5 µL, RBF buffer, 25.5 µL LLB, 12 µL DNA  
523 library) loaded into the R9.4 flowcell through the SpotON port. A standard 48-hour  
524 sequencing protocol was initiated using the MinKNOW™ v1.5.5 with the respective local  
525 basecalling algorithm implemented in the MinKNOW™ software. The R9.4 raw data was  
526 generated during only 3h sequencing run.

527

#### 528 *The rrn database*

529 We built a database containing the genetic information for the 16S and 23S rRNA genes  
530 and the ITS sequence in all the complete and draft bacterial genomes available in the NCBI  
531 database (<ftp://ftp.ncbi.nlm.nih.gov/genomes/genbank/bacteria>). A total of 67,199 genomes  
532 were analysed by downloading the "*fna*" files and parsing for rRNA genes into the  
533 respective "*gff*" annotation file. Chromosome coordinates for *rrn* regions were parsed and  
534 used to extract such a DNA sequences from complete chromosomes or DNA contigs  
535 assembled. The resulting *rrn* sequences were analysed and the length distribution was  
536 assessed. We retrieved a total of 47,698 *rrn* sequences with an average of 4,993 nt in  
537 length. By selecting the size distribution equal to the 99th percentile (two-sided), we  
538 discarded potential incomplete or aberrant annotated *rrn* sequences and observed that *rrn*  
539 sequences can be found between 4,196 and 5,790nt; under these boundaries, our *rrn*



540 database finally accounted for a total of 46,920 sequences. Equivalent databases were built  
541 by parsing the respective *rrn* sequences with the RNammer tool to discriminate the 16S,  
542 ITS, and 23S rRNA sequences [24]. To remove the level of redundancy of our *rrn* database  
543 and to maintain the potential discriminatory power at strain level, we performed clustering  
544 analysis using USEARCH v8 tool for sequence analysis and the option *-otu\_radius\_pct*  
545 equal 0 [25], thus obtaining a total of 22,350 reference sequences. For comparative aims,  
546 the *rrn* database and the 16S, ITS, and 23S databases were also analysed using the option -  
547 *otu\_radius\_pct* with values ranging from 1 to 3. For accessing to *rrn* database and the  
548 respective species annotation, see Availability of supporting data.

549

#### 550 *MinION data analysis*

551 Read-mapping was performed using the LAST aligner v.189 [26] with parameters *-q1 -b1 -*  
552 *Q0 -a1 -r1*. Each 1D read was compared in a competitive way against the entire *rrn*  
553 database and the best hit was selected by obtaining the highest alignment score. Alignment  
554 length as well as alignment coordinates in target and query sequences were parsed from the  
555 LAST output and the sequence identity between matched regions was calculated using the  
556 python *Levenshtein* distance package. An iterative processing was used to determine  
557 thresholds for detection by evaluating the taxonomy distribution with reads subsampling  
558 and different levels of sequence identity in top scored alignments. High quality alignments  
559 were selected by filtering out those with identity values up to the 50th percentile of the  
560 distribution of identity values of all reads per sample (~69%) in the R9 run. Therefore,  
561 taxonomy assignment was based exclusively on alignments with  $\geq 70\%$  identity. For data  
562 derived from R9.4 chemistry, high quality alignments were selected by filtering out those  
563 with identity values up to 25th percentile of the distribution, thus retaining alignments with

564  $\geq 81\%$  identity. Basic stats, distributions, filtering, and comparisons were performed in R  
565 v3.2.0 (<https://cran.r-project.org>). For relative quantification of species the singletons were  
566 removed and the microbial species considered to be predominantly present in the mock  
567 communities were those with a relative a proportion  $\geq 1\%$ , a value that demonstrated to be  
568 discriminative to always obtain the expected microbial diversity during the iterative  
569 processing of alignments. The coverage bias was calculated by obtaining fold-change  
570 ( $\text{Log}_2$ ) of species-specific read counting against the expected (theoretical) average for the  
571 entire community according to information provided by the manufacturers.

572

### 573 *Illumina data analysis*

574 Fastq paired-end raw data (ENA experiment accession ERX2062322) was were assembled  
575 using *Flash* software [27]. The HM782D and D6305 reads were de-multiplexed and  
576 barcode and primers were removed using *Mothur* v1.36.1 [28]. The sequences were then  
577 processed for chimera removal using *Uchime* algorithm [29] and SILVA reference set of  
578 16S sequences [30]. A normalized subset of 10,000 sequences per sample was created by  
579 random selection after shuffling (10,000X) of the original dataset. Taxonomy assessment  
580 was performed using the RDP classifier v2.7 [31]. The Operational Taxonomic Unit  
581 (OTU)-picking approach was performed with the normalized subset of 10,000 sequences  
582 and the *uclust* algorithm implemented in USEARCH v8.0.1623 and the options -  
583 *otu\_radius\_pct* equal 3 for clustering at 97% and *-minsize* 2 for remove singletons [25].  
584 SINA server was used for taxonomy identification of OTUs recovered from Illumina  
585 MiSeq data [32].

586

## 587 **Availability of supporting data**

588 Accessions for the *rrn* database containing the reference sequences for alignments and  
589 taxonomic annotation is available at [https://github.com/alfbenpa/rrn\\_db](https://github.com/alfbenpa/rrn_db). The code source of  
590 the original *split\_barcodes.pl* perl script is available at  
591 <https://github.com/nanoporetech/barcoding/releases/tag/1.0.0> with ONT copyright.

592

## 593 **Abbreviations**

594 EC , European Commission; ENA, European Nucleotide Archive; HDF, Hierarchical Data  
595 Format; ITS, internal transcribed spacer; NCBI, National Center for Biotechnology  
596 Information; ONT, Oxford Nanopore Technologies; PCR, Polymerase Chain Reaction;  
597 rDNA, DNA encoding for the Ribosomal RNA; rRNA, Ribosomal RNA; *rrn*, the DNA  
598 region containing the 16S and 23S bacterial rRNA genes and its respective ITS region;  
599 SINA, SILVA Incremental Aligner; USB, Universal Serial Bus.

600

## 601 **Competing interests**

602 ABP is part of the MinION™ Access Programme (MAP).

603

## 604 **Authors' contributions**

605 ABP and YS designed the study and managed the project. ABP performed the experiments,  
606 analysed and managed the data. ABP draft the manuscript. Both authors read and approved  
607 the final manuscript.

608

## 609 **Acknowledgements**

610 This work and the contract to ABP is supported by the European Union's Seventh  
611 Framework Program under the grant agreement n° 613979 (MyNewGut).  
612

## 613 References

- 614 1. Ip CL, Loose M, Tyson JR, de Cesare M, Brown BL, Jain M, Leggett RM, Eccles  
615 DA, Zalunin V, Urban JM *et al*: **MinION Analysis and Reference Consortium:  
616 Phase 1 data release and analysis.** *F1000Res* 2015, **4**:1075.
- 617 2. Loman NJ, Quick J, Simpson JT: **A complete bacterial genome assembled de  
618 novo using only nanopore sequencing data.** *Nat Methods* 2015, **12**(8):733-735.
- 619 3. Karlsson E, Larkeryd A, Sjodin A, Forsman M, Stenberg P: **Scaffolding of a  
620 bacterial genome using MinION nanopore sequencing.** *Sci Rep* 2015, **5**:11996.
- 621 4. Risse J, Thomson M, Patrick S, Blakely G, Koutsovoulos G, Blaxter M, Watson M:  
622 **A single chromosome assembly of *Bacteroides fragilis* strain BE1 from  
623 Illumina and MinION nanopore sequencing data.** *Gigascience* 2015, **4**:60.
- 624 5. Ammar R, Paton TA, Torti D, Shlien A, Bader GD: **Long read nanopore  
625 sequencing for detection of HLA and CYP2D6 variants and haplotypes.**  
626 *F1000Res* 2015, **4**:17.
- 627 6. Norris AL, Workman RE, Fan Y, Eshleman JR, Timp W: **Nanopore sequencing  
628 detects structural variants in cancer.** *Cancer Biol Ther* 2016:1-8.
- 629 7. Greninger AL, Naccache SN, Federman S, Yu G, Mbala P, Bres V, Stryke D,  
630 Bouquet J, Somasekar S, Linnen JM *et al*: **Rapid metagenomic identification of  
631 viral pathogens in clinical samples by real-time nanopore sequencing analysis.**  
632 *Genome Med* 2015, **7**(1):99.
- 633 8. Kilianski A, Haas JL, Corriveau EJ, Liem AT, Willis KL, Kadavy DR, Rosenzweig  
634 CN, Minot SS: **Bacterial and viral identification and differentiation by  
635 amplicon sequencing on the MinION nanopore sequencer.** *Gigascience* 2015,  
636 **4**:12.
- 637 9. Ashton PM, Nair S, Dallman T, Rubino S, Rabsch W, Mwaigwisya S, Wain J,  
638 O'Grady J: **MinION nanopore sequencing identifies the position and structure  
639 of a bacterial antibiotic resistance island.** *Nat Biotechnol* 2015, **33**(3):296-300.
- 640 10. Judge K, Harris SR, Reuter S, Parkhill J, Peacock SJ: **Early insights into the  
641 potential of the Oxford Nanopore MinION for the detection of antimicrobial  
642 resistance genes.** *J Antimicrob Chemother* 2015, **70**(10):2775-2778.
- 643 11. Benitez-Paez A, Portune KJ, Sanz Y: **Species-level resolution of 16S rRNA gene  
644 amplicons sequenced through the MinION portable nanopore sequencer.**  
645 *Gigascience* 2016, **5**:4.
- 646 12. Li C, Cheng KR, Boey JHE, Ng HQA, Wilm A, Nagarajan N: **INC-Seq: Accurate  
647 single molecule reads using nanopore sequencing.** *bioRxiv* 2016:doi:  
648 <http://dx.doi.org/10.1101/038042>
- 649 13. Myer PR, Kim M, Freetly HC, Smith TP: **Evaluation of 16S rRNA amplicon  
650 sequencing using two next-generation sequencing technologies for phylogenetic  
651 analysis of the rumen bacterial community in steers.** *J Microbiol Methods* 2016,  
652 **127**:132-140.
- 653 14. Schloss PD, Jenior ML, Koumpouras CC, Westcott SL, Highlander SK:  
654 **Sequencing 16S rRNA gene fragments using the PacBio SMRT DNA  
655 sequencing system.** *PeerJ* 2016, **4**:e1869.

- 656 15. Shin J, Lee S, Go MJ, Lee SY, Kim SC, Lee CH, Cho BK: **Analysis of the mouse**  
657 **gut microbiome using full-length 16S rRNA amplicon sequencing.** *Sci Rep*  
658 2016, **6**:29681.
- 659 16. Watson M, Thomson M, Risse J, Talbot R, Santoyo-Lopez J, Gharbi K, Blaxter M:  
660 **poRe: an R package for the visualization and analysis of nanopore sequencing**  
661 **data.** *Bioinformatics* 2014, **31**(1):114-115.
- 662 17. Li C, Chng KR, Boey EJ, Ng AH, Wilm A, Nagarajan N: **INC-Seq: accurate**  
663 **single molecule reads using nanopore sequencing.** *Gigascience* 2016, **5**(1):34.
- 664 18. Fernandez J, Avendano-Herrera R: **Analysis of 16S-23S rRNA gene internal**  
665 **transcribed spacer of *Vibrio anguillarum* and *Vibrio ordalii* strains isolated**  
666 **from fish.** *FEMS Microbiol Lett* 2009, **299**(2):184-192.
- 667 19. Maslunka C, Gurtler V, Seviour R: **Unusual features of the sequences of copies of**  
668 **the 16S-23S rRNA internal transcribed spacer regions of *Acinetobacter***  
669 ***bereziniae*, *Acinetobacter guillouiae* and *Acinetobacter baylyi* arise from**  
670 **horizontal gene transfer events.** *Microbiology* 2015, **161**(Pt 2):322-329.
- 671 20. Stewart FJ, Cavanaugh CM: **Intragenomic variation and evolution of the**  
672 **internal transcribed spacer of the rRNA operon in bacteria.** *J Mol Evol* 2007,  
673 **65**(1):44-67.
- 674 21. Tambong JT, Xu R, Bromfield ES: **Intercistronic heterogeneity of the 16S-23S**  
675 **rRNA spacer region among *Pseudomonas* strains isolated from subterranean**  
676 **seeds of hog peanut (*Amphicarpa bracteata*).** *Microbiology* 2009, **155**(Pt  
677 8):2630-2640.
- 678 22. Hunt DE, Klepac-Ceraj V, Acinas SG, Gautier C, Bertilsson S, Polz MF:  
679 **Evaluation of 23S rRNA PCR primers for use in phylogenetic studies of**  
680 **bacterial diversity.** *Appl Environ Microbiol* 2006, **72**(3):2221-2225.
- 681 23. Klindworth A, Pruesse E, Schweer T, Peplies J, Quast C, Horn M, Glockner FO:  
682 **Evaluation of general 16S ribosomal RNA gene PCR primers for classical and**  
683 **next-generation sequencing-based diversity studies.** *Nucleic Acids Res* 2012,  
684 **41**(1):e1.
- 685 24. Lagesen K, Hallin P, Rodland EA, Staerfeldt HH, Rognes T, Ussery DW:  
686 **RNAmmer: consistent and rapid annotation of ribosomal RNA genes.** *Nucleic*  
687 *Acids Res* 2007, **35**(9):3100-3108.
- 688 25. Edgar RC: **Search and clustering orders of magnitude faster than BLAST.**  
689 *Bioinformatics* 2010, **26**(19):2460-2461.
- 690 26. Frith MC, Hamada M, Horton P: **Parameters for accurate genome alignment.**  
691 *BMC Bioinformatics* 2010, **11**:80.
- 692 27. Magoc T, Salzberg SL: **FLASH: fast length adjustment of short reads to**  
693 **improve genome assemblies.** *Bioinformatics* 2011, **27**(21):2957-2963.
- 694 28. Schloss PD, Westcott SL, Ryabin T, Hall JR, Hartmann M, Hollister EB,  
695 Lesniewski RA, Oakley BB, Parks DH, Robinson CJ *et al*: **Introducing mothur:**  
696 **open-source, platform-independent, community-supported software for**  
697 **describing and comparing microbial communities.** *Appl Environ Microbiol*  
698 2009, **75**(23):7537-7541.
- 699 29. Edgar RC, Haas BJ, Clemente JC, Quince C, Knight R: **UCHIME improves**  
700 **sensitivity and speed of chimera detection.** *Bioinformatics* 2011, **27**(16):2194-  
701 2200.

- 702 30. Quast C, Pruesse E, Yilmaz P, Gerken J, Schweer T, Yarza P, Peplies J, Glockner  
703 FO: **The SILVA ribosomal RNA gene database project: improved data**  
704 **processing and web-based tools.** *Nucleic Acids Res* 2013, **41**(Database  
705 issue):D590-596.
- 706 31. Wang Q, Garrity GM, Tiedje JM, Cole JR: **Naive Bayesian classifier for rapid**  
707 **assignment of rRNA sequences into the new bacterial taxonomy.** *Appl Environ*  
708 *Microbiol* 2007, **73**(16):5261-5267.
- 709 32. Pruesse E, Peplies J, Glockner FO: **SINA: accurate high-throughput multiple**  
710 **sequence alignment of ribosomal RNA genes.** *Bioinformatics* 2012, **28**(14):1823-  
711 1829.  
712  
713

## 714 **Figure legends**

715

716 **Figure 1.** Organization of the *rrn* region in bacteria. A - hypothetical transcriptional  
717 arrangements expected for *rrn* and tested experimentally using two sets of primer pairs (see  
718 small arrows drawn in each configuration). B - Agarose gel electrophoresis of PCR  
719 reactions performed under the two hypothetical arrangements of *rrn*; lanes: 1) 1kb ruler  
720 (Fermentas), 2) PCR reaction from the top configuration in panel A, 3) PCR reaction from  
721 the bottom configuration in panel A. The GelAnalyser Java application was used to perform  
722 the band size analysis of the 1kb ruler standard (C) and the amplicons obtained from human  
723 faecal DNA (D).

724

725 **Figure 2.** Variability of the *rrn* region and its functional domains. The *rrn* database  
726 compiled after parsing more than 67,000 draft and complete bacterial genomes was  
727 assessed by clustering analysis at different levels of sequence identity: 97 (white bars), 98  
728 (light grey bars), 99 (dark grey bars), and 100% (black bars). For comparative aims, the  
729 functional DNA sequences encoded into the *rrn* region were also individually studied. The  
730 normalized diversity (y axis) resulted from calculate the number of clusters obtained for  
731 each analysis normalized with the median sizes of respective regions in terms of kb, and  
732 referenced against the value obtained for 16S sequences clustered at 97%, the canonical  
733 threshold for species assignment.

734

735 **Figure 3.** Microbial structure of the mock communities. A and B - microbial species and  
736 respective relative proportions determined to be present in the HM782D and D6305 mock  
737 communities, respectively, following the analysis of raw data obtained from *rrn* amplicon  
738 sequencing in the MinION<sup>TM</sup> and chemistry R9. C and D - Comparative analysis of the  
739 expected microbial species and proportions against the data obtained after mapping of reads  
740 generated by a 4.5kbp amplicon PCR and sequenced in MinION<sup>TM</sup> device with R9 and  
741 R9.4 chemistries, for HM782D and D6305 respectively. E - Linear correlation analysis of  
742 relative read proportions obtained for all bacterial species present in HM872D and D6305  
743 mock communities with R9 and R9.4 chemistries.

744

745 **Supplementary Material 1.** Comparison of MinION<sup>TM</sup> and MiSeq outputs. Data obtained  
746 from Illumina MiSeq sequencing of V4-V5 16S region from respective mock communities  
747 was compared with outputs from MinION<sup>TM</sup> R9 and R9.4. Given that taxonomy  
748 identification of MiSeq reads at species level only retrieved very few assignments, we  
749 compiled the species distribution of MinION<sup>TM</sup> data at genus level.

750

751 **Supplementary Material 2.** MS Excel file compiling the output information retrieved  
752 from SINA server (<https://www.arb-silva.de/aligner/>) for taxonomy identification of 41  
753 OTUs derived from analysis of HM782D with Illumina MiSeq approach. Information  
754 regarding sequence quality, identity percentage, mapping coordinates against *E. coli*  
755 reference, length and taxonomy based on SILVA, Greengenes, and RDP databases is  
756 showed for all OTU.

757

758 **Supplementary Material 3.** MS Excel file compiling the output information retrieved  
759 from SINA server (<https://www.arb-silva.de/aligner/>) for taxonomy identification of 18



760 OTUs derived from analysis of D6305 with Illumina MiSeq approach. Information  
761 regarding sequence quality, identity percentage, mapping coordinates against *E. coli*  
762 reference, length and taxonomy based on SILVA, Greengenes, and RDP databases is  
763 showed for all OTU.  
764

Table 1. Barcodes and primers used to generate amplicon libraries.

| Sample                    | Barcode                                          | Primer                                         | Barcode extended <sup>1</sup>                                                 |
|---------------------------|--------------------------------------------------|------------------------------------------------|-------------------------------------------------------------------------------|
| HM-782D                   | (bc01)<br>GGTGCTGAAGAAAGTTGTCGGTGTCTTTGTGTTAACCT | (S-D-Bact-0008-c-S-20)<br>AGAGTTTGATCMTGGCTCAG | (bc01F)<br><u>GGTGCTGAAGAAAGTTGTCGGTGTCTTTGTGTTAACCT</u> AGAGTTTGATCMTGGCTCAG |
|                           | (bc01)<br>GGTGCTGAAGAAAGTTGTCGGTGTCTTTGTGTTAACCT | (23S-2241R)<br>ACCGCCCCAGTHAAACT               | (bc01R)<br><u>GGTGCTGAAGAAAGTTGTCGGTGTCTTTGTGTTAACCT</u> ACCGCCCCAGTHAAACT    |
| D6503                     | (bc08)<br>GGTGCTGTTTCAGGGAACAAACCAAGTTACGTTAACCT | (S-D-Bact-0008-c-S-20)<br>AGAGTTTGATCMTGGCTCAG | (bc08F)<br><u>GGTGCTGTTTCAGGGAACAAACCAAGTTACGTTAACCT</u> AGAGTTTGATCMTGGCTCAG |
|                           | (bc08)<br>GGTGCTGTTTCAGGGAACAAACCAAGTTACGTTAACCT | (23S-2241R)<br>ACCGCCCCAGTHAAACT               | (bc08R)<br><u>GGTGCTGTTTCAGGGAACAAACCAAGTTACGTTAACCT</u> ACCGCCCCAGTHAAACT    |
| <b>Other primers used</b> |                                                  |                                                |                                                                               |
| <b>Human fecal DNA</b>    |                                                  | (S-D-Bact-1391-a-A-17)<br>GACGGGCGGTGWGTRCA    |                                                                               |
|                           |                                                  | (23S-129F)<br>CYGAATGGGRVAACC                  |                                                                               |

1 Underlined sequences correspond with the barcode sequence

Table 2. Basic stats comparison of R9 and R9.4 reads after processing.

|                                 | <b>R9<sup>1</sup></b>                                                    | <b>R9.4<sup>1</sup></b>                                                    |
|---------------------------------|--------------------------------------------------------------------------|----------------------------------------------------------------------------|
| Total raw data                  | 17,038 (100%)                                                            | 39,216 (100%)                                                              |
| Reads > 1.5kb                   | 12,278 (72%)                                                             | 33,764 (86%)                                                               |
| Read length distribution        | 25th percentile = 2,847nt<br>Median = 3,303nt<br>75th percentile = 3,754 | 25th percentile = 3,730nt<br>Median = 3,976nt<br>75th percentile = 4,135nt |
| Reads aligned (bc1 + bc8)       | 3,227 (19%)                                                              | 14,392 (43%)                                                               |
| Alignment identity distribution | 25th percentile = 66.5%<br>Median = 69 %<br>75th percentile = 73%        | 25th percentile = 81%<br>Median = 85%<br>75th percentile = 87%             |
| Maximum identity                | 86.7%                                                                    | 92%                                                                        |

1 The experiment and run accessions for the R9 data at ENA are ERX1676087 and ERR1605520, respectively.

2 The experiment and run accessions for R9.4 data at ENA are ERX1981944 and ERR1924217, respectively.

Table 3. Comparative analysis among data generated from MinION and MiSeq platforms.

| Genera HM782D                               | Relative read proportion |                      |                      |                      | Coverage bias |               |                 |
|---------------------------------------------|--------------------------|----------------------|----------------------|----------------------|---------------|---------------|-----------------|
|                                             | Reference                | PCR+MiSeq            | PCR+MinION-R9        | PCR+MinION-R9.4      | PCR+MiSeq     | PCR+MinION-R9 | PCR+MinION-R9.4 |
| <i>Acinetobacter spp.</i>                   | 0.050                    | 0.019                | 0.046                | 0.032                | -1.42         | -0.12         | -0.62           |
| <i>Actinomyces spp.</i>                     | 0.050                    | 0.010                | 0.001                | 0.003                | -2.36         | -5.36         | -4.02           |
| <i>Bacillus spp.</i>                        | 0.050                    | 0.017                | 0.102                | 0.045                | -1.57         | 1.03          | -0.16           |
| <i>Bacteroides spp.</i>                     | 0.050                    | 0.106                | 0.059                | 0.037                | 1.08          | 0.25          | -0.42           |
| <i>Clostridium spp.</i>                     | 0.050                    | 0.125                | 0.027                | 0.032                | 1.32          | -0.91         | -0.66           |
| <i>Deinococcus spp.</i>                     | 0.050                    | 0.109                | 0.000                | 0.000                | 1.12          | ND            | ND              |
| <i>Enterococcus spp.</i>                    | 0.050                    | 0.022                | 0.012                | 0.013                | -1.17         | -2.04         | -1.93           |
| <i>Escherichia/Shigella spp.</i>            | 0.050                    | 0.038                | 0.172                | 0.209                | -0.38         | 1.79          | 2.07            |
| <i>Helicobacter spp.</i>                    | 0.050                    | 0.040                | 0.000                | 0.000                | -0.32         | ND            | ND              |
| <i>Lactobacillus spp.</i>                   | 0.050                    | 0.065                | 0.051                | 0.068                | 0.38          | 0.03          | 0.45            |
| <i>Listeria spp.</i>                        | 0.050                    | 0.024                | 0.074                | 0.133                | -1.04         | 0.57          | 1.41            |
| <i>Neisseria spp.</i>                       | 0.050                    | 0.099                | 0.064                | 0.056                | 0.98          | 0.36          | 0.17            |
| <i>Propionibacterium spp.</i>               | 0.050                    | 0.021                | 0.079                | 0.097                | -1.25         | 0.66          | 0.96            |
| <i>Pseudomonas spp.</i>                     | 0.050                    | 0.038                | 0.018                | 0.079                | -0.39         | -1.46         | 0.67            |
| <i>Rhodobacter spp.</i>                     | 0.050                    | 0.013                | 0.002                | 0.004                | -1.91         | -4.36         | -3.51           |
| <i>Staphylococcus spp.</i>                  | 0.100                    | 0.037                | 0.125                | 0.086                | -1.44         | 0.32          | -0.22           |
| <i>Streptococcus spp.</i>                   | 0.150                    | 0.217                | 0.115                | 0.093                | 0.53          | -0.38         | -0.69           |
| <b>Genera D6305</b>                         |                          |                      |                      |                      |               |               |                 |
| <i>Bacillus spp.</i>                        | 0.139                    | 0.574                | 0.383                | 0.340                | 2.04          | 1.46          | 1.29            |
| <i>Enterococcus spp.</i>                    | 0.088                    | 0.078                | 0.057                | 0.082                | -0.17         | -0.64         | -0.11           |
| <i>Escherichia/Shigella spp.</i>            | 0.113                    | 0.035                | 0.167                | 0.137                | -1.67         | 0.56          | 0.28            |
| <i>Lactobacillus spp.</i>                   | 0.198                    | 0.104                | 0.049                | 0.049                | -0.93         | -2.01         | -2.01           |
| <i>Listeria spp.</i>                        | 0.163                    | 0.046                | 0.080                | 0.118                | -1.82         | -1.03         | -0.46           |
| <i>Pseudomonas spp.</i>                     | 0.058                    | 0.060                | 0.038                | 0.039                | 0.05          | -0.62         | -0.56           |
| <i>Salmonella spp.</i>                      | 0.115                    | 0.049                | 0.099                | 0.138                | -1.22         | -0.22         | 0.26            |
| <i>Staphylococcus spp.</i>                  | 0.126                    | 0.051                | 0.094                | 0.095                | -1.30         | -0.42         | -0.41           |
| <b>Average</b>                              | <b>0.080</b>             | <b>0.080</b>         | <b>0.077</b>         | <b>0.079</b>         | <b>-0.51</b>  | <b>-0.55</b>  | <b>-0.36</b>    |
| <b>Median</b>                               | <b>0.050</b>             | <b>0.048</b>         | <b>0.062</b>         | <b>0.074</b>         | <b>-0.72</b>  | <b>-0.30</b>  | <b>-0.29</b>    |
| <b>Min</b>                                  | <b>0.050</b>             | <b>0.010</b>         | <b>0.000</b>         | <b>0.000</b>         | <b>-2.36</b>  | <b>-5.36</b>  | <b>-4.02</b>    |
| <b>Max</b>                                  | <b>0.198</b>             | <b>0.574</b>         | <b>0.383</b>         | <b>0.340</b>         | <b>2.04</b>   | <b>1.79</b>   | <b>2.07</b>     |
| <b>Pearson's <math>r^a</math> (p-value)</b> | --                       | <b>0.39 (0.0504)</b> | <b>0.43 (0.0306)</b> | <b>0.41 (0.0417)</b> |               |               |                 |
| <b>Pearson's <math>r^b</math> (p-value)</b> | --                       | --                   | <b>0.73 (0.0001)</b> | <b>0.64 (0.0005)</b> |               |               |                 |

a Pearson's r calculated from comparisons of R9, R9.4, and MiSeq data with reference proportions, respectively.

b Pearson's r calculated from comparisons of R9 and R9.4 data with MiSeq output, respectively.

**A**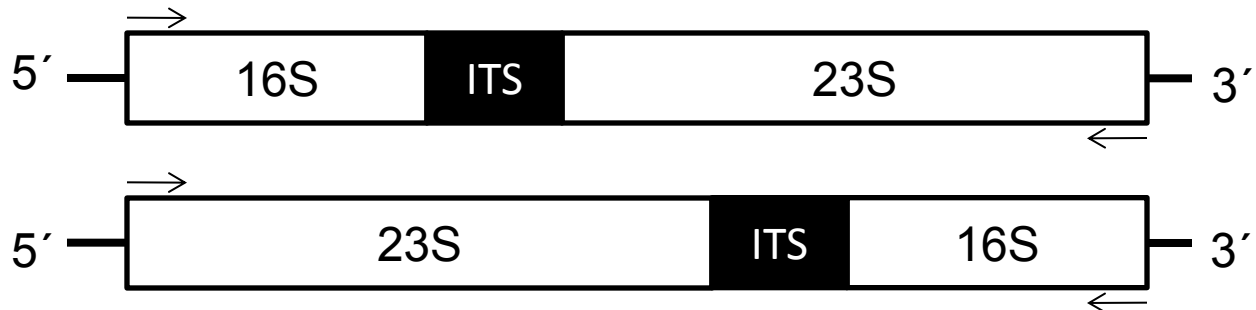**B**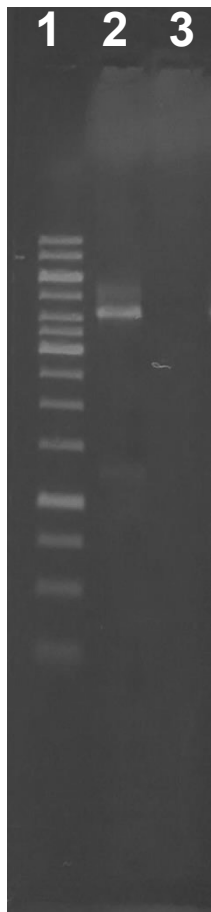**C**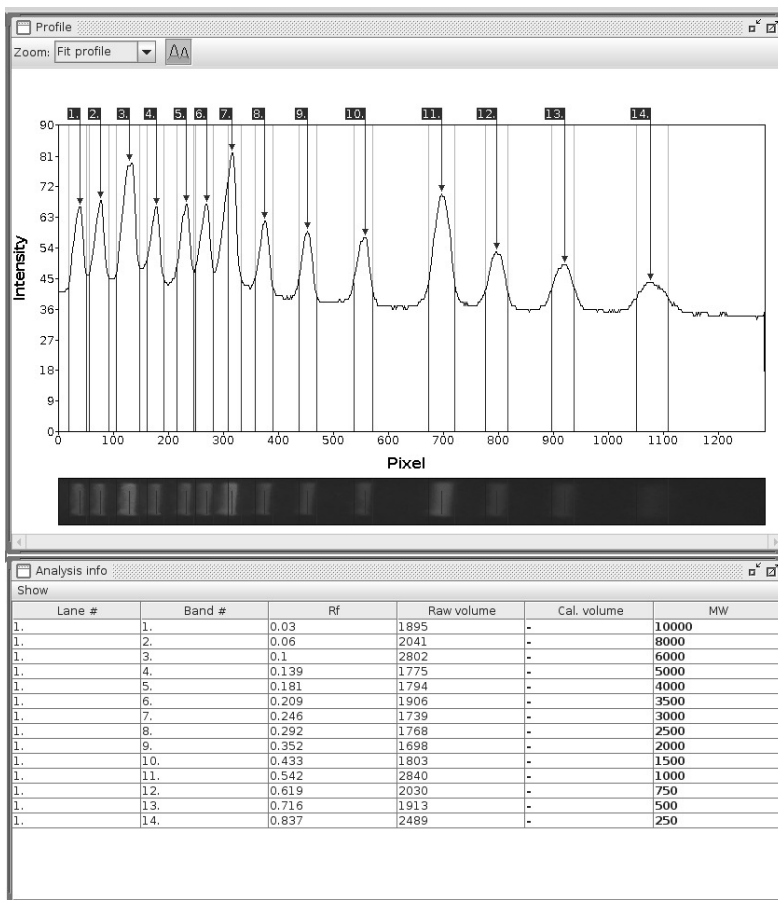**D**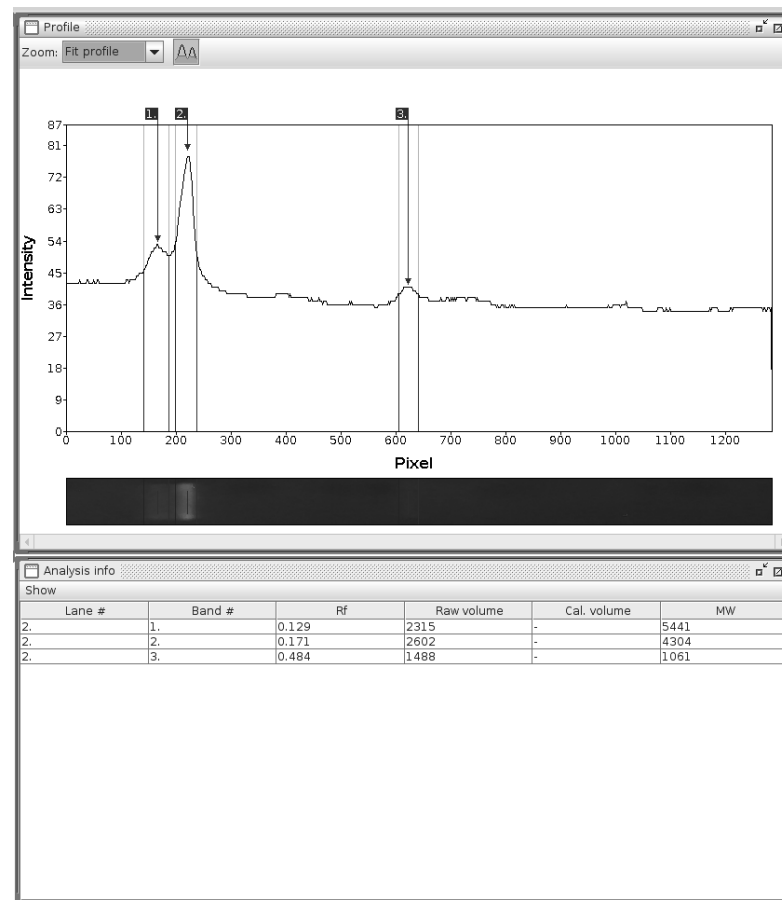

97% 98% 99% 100%

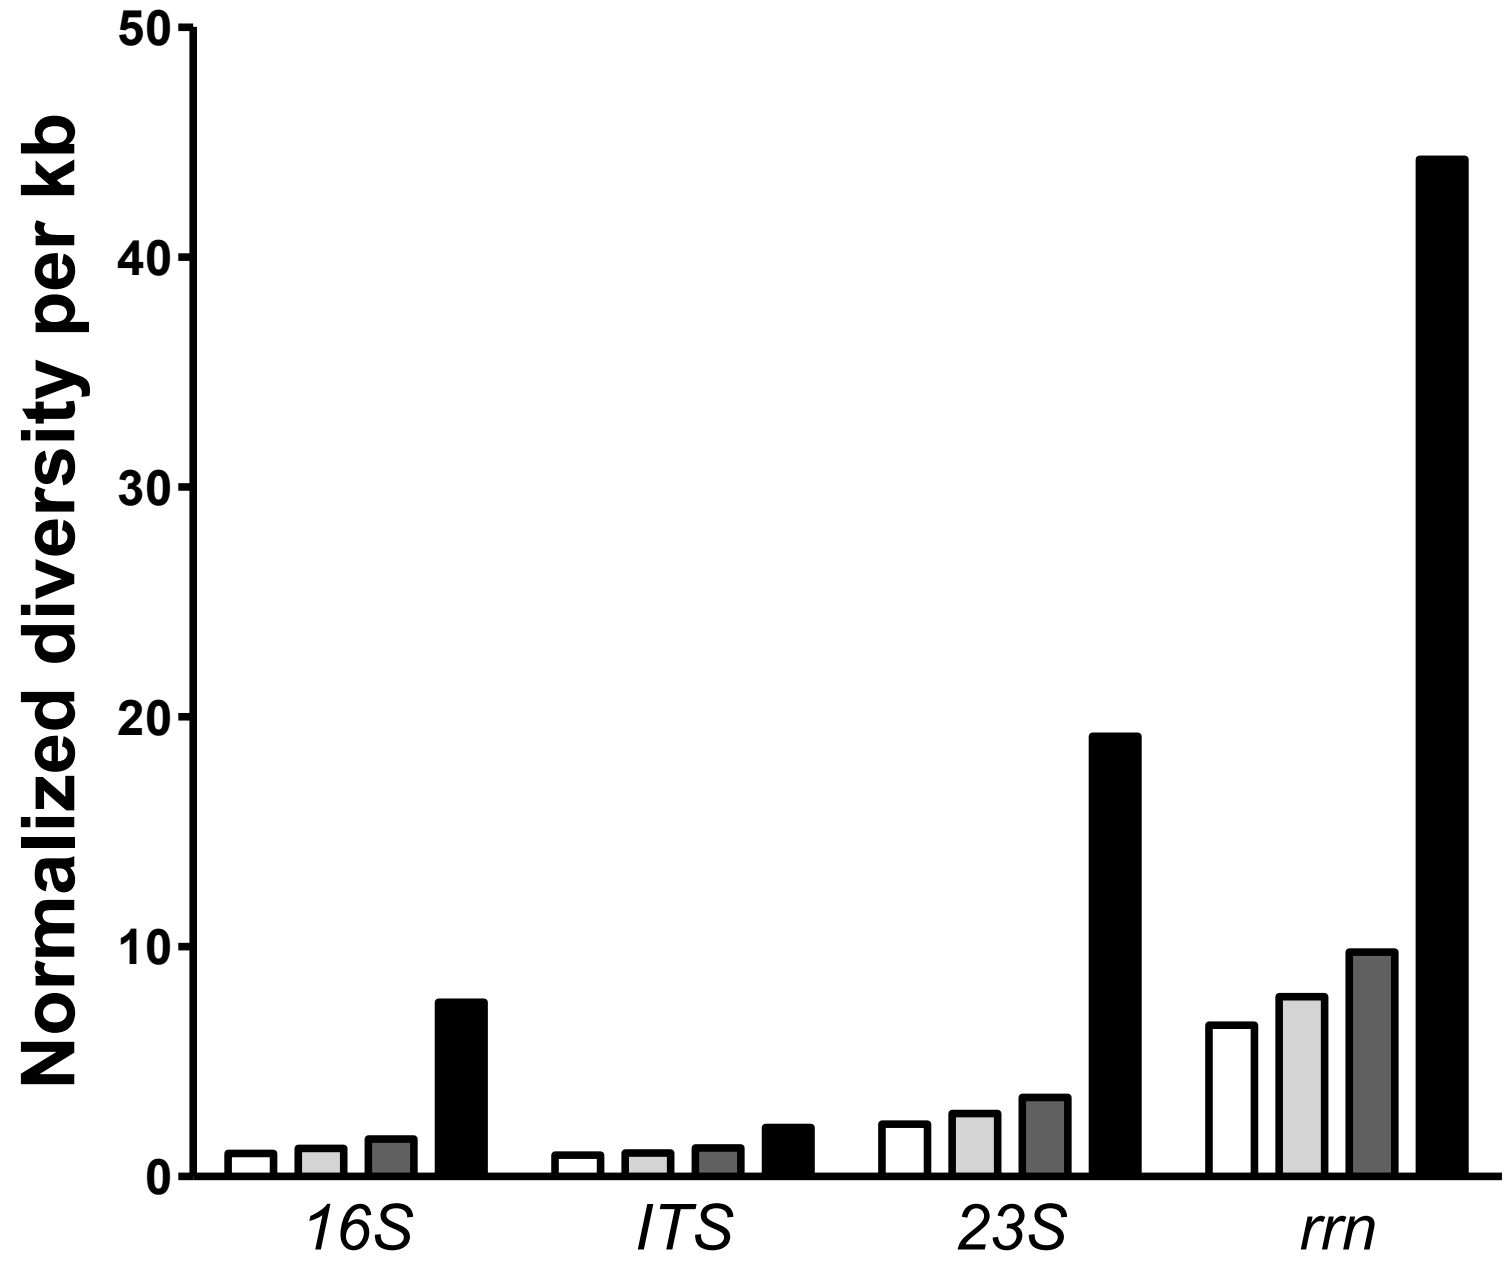

**A**

**HM782D**

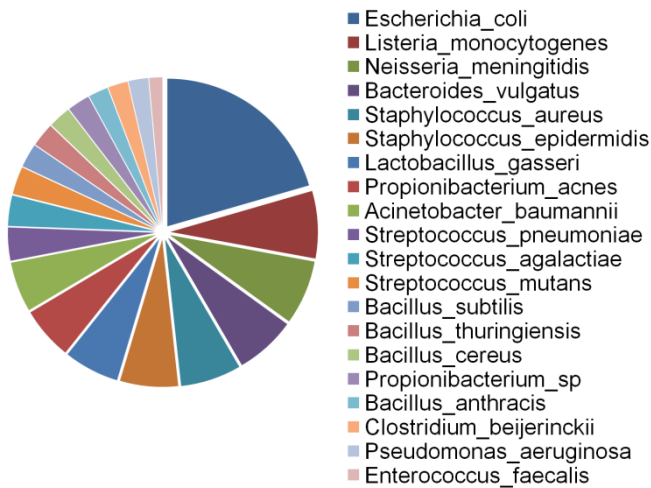

**B**

**D6305**

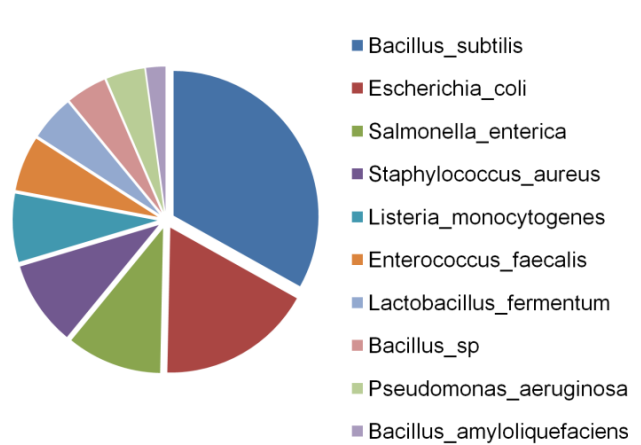

**C**

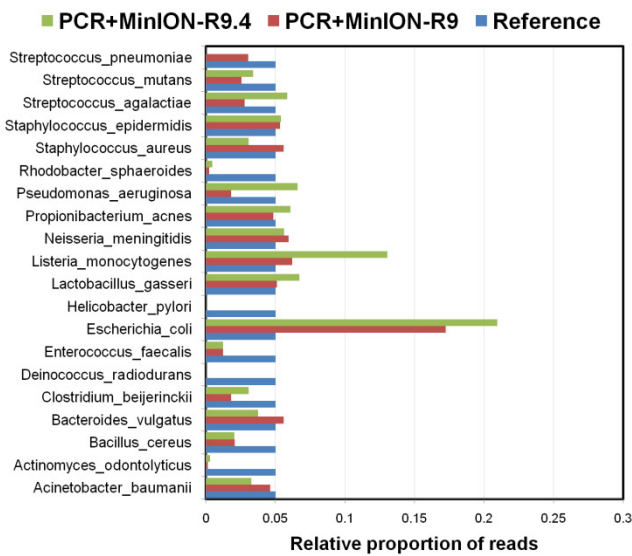

**D**

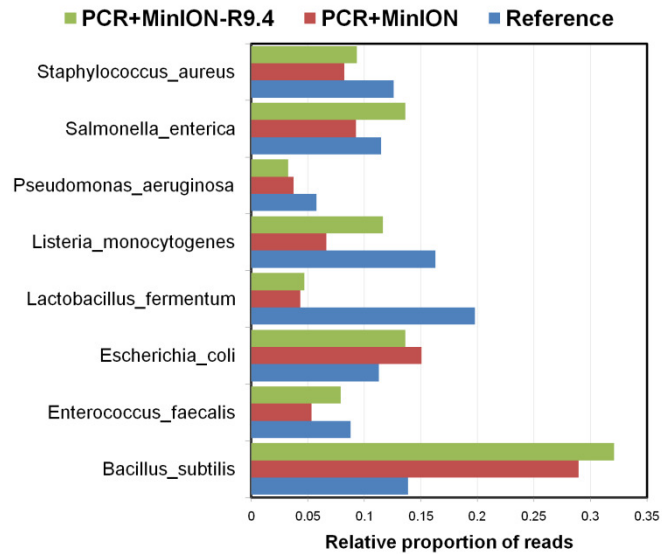

**E**

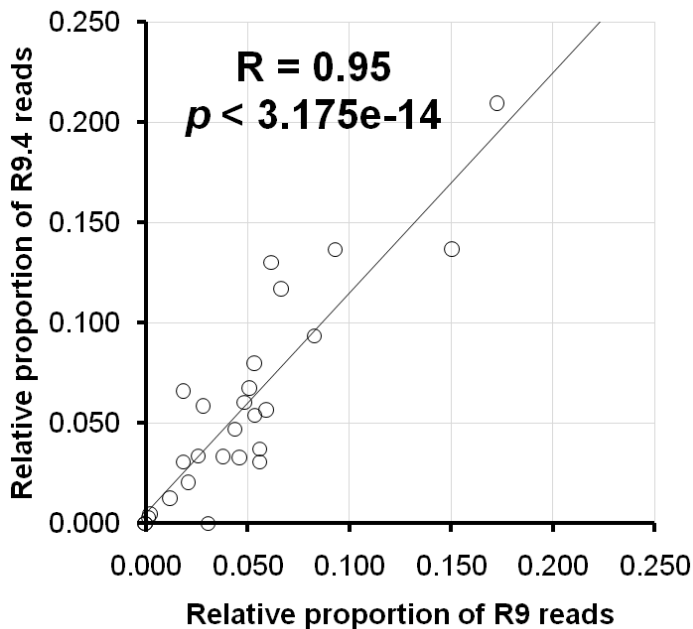

Source: http://www.biorxiv.org/content/10.1101/117143v2.full.pdf
